# Supplementary material for: Intrachromosomal colocalization strengthens co-expression, co-modification and evolutionary conservation of neighboring genes
Source: PubMed Central journal article supplement (PMC6000932; doi:10.1186/s12864-018-4844-1), 2018-06-13

A

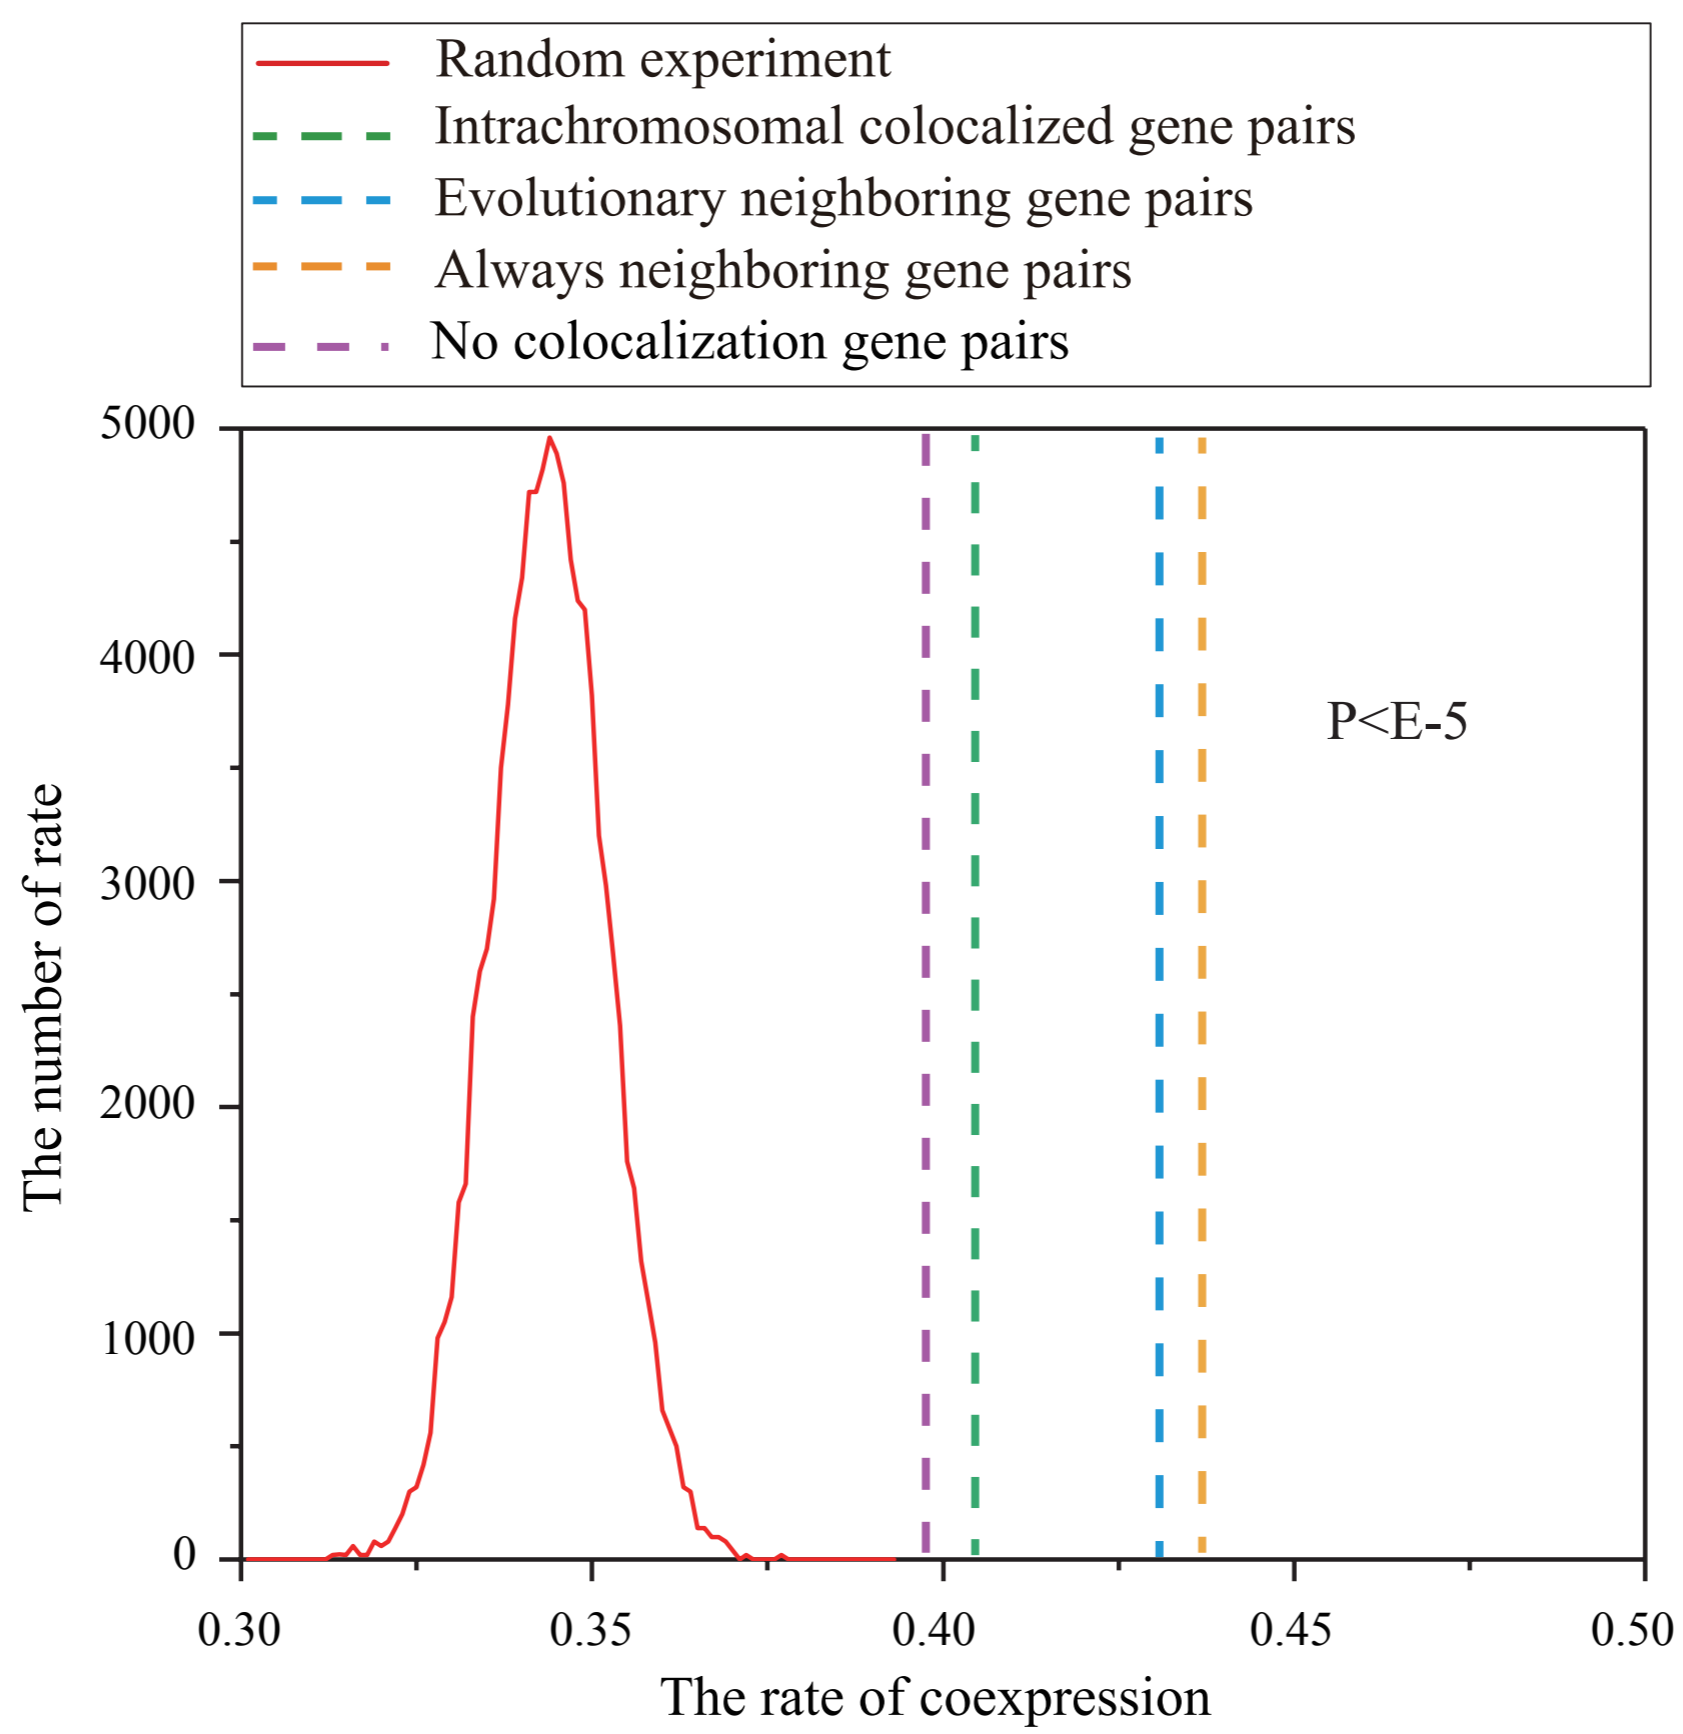

B

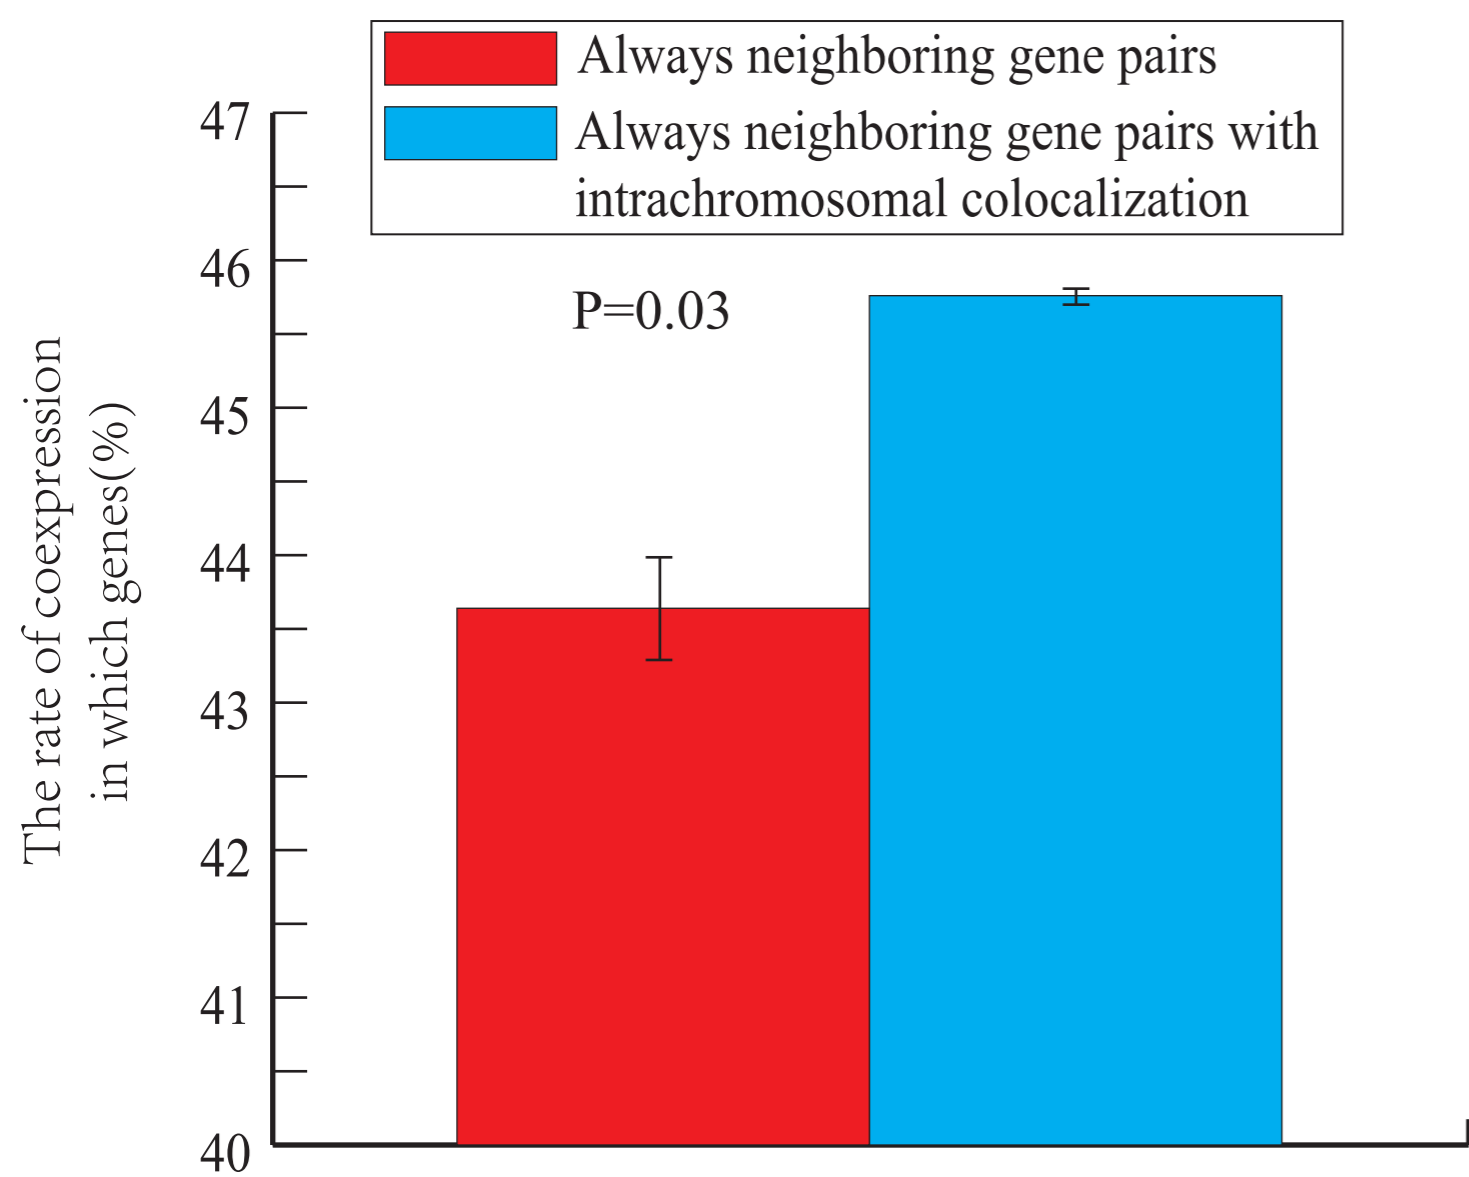

C

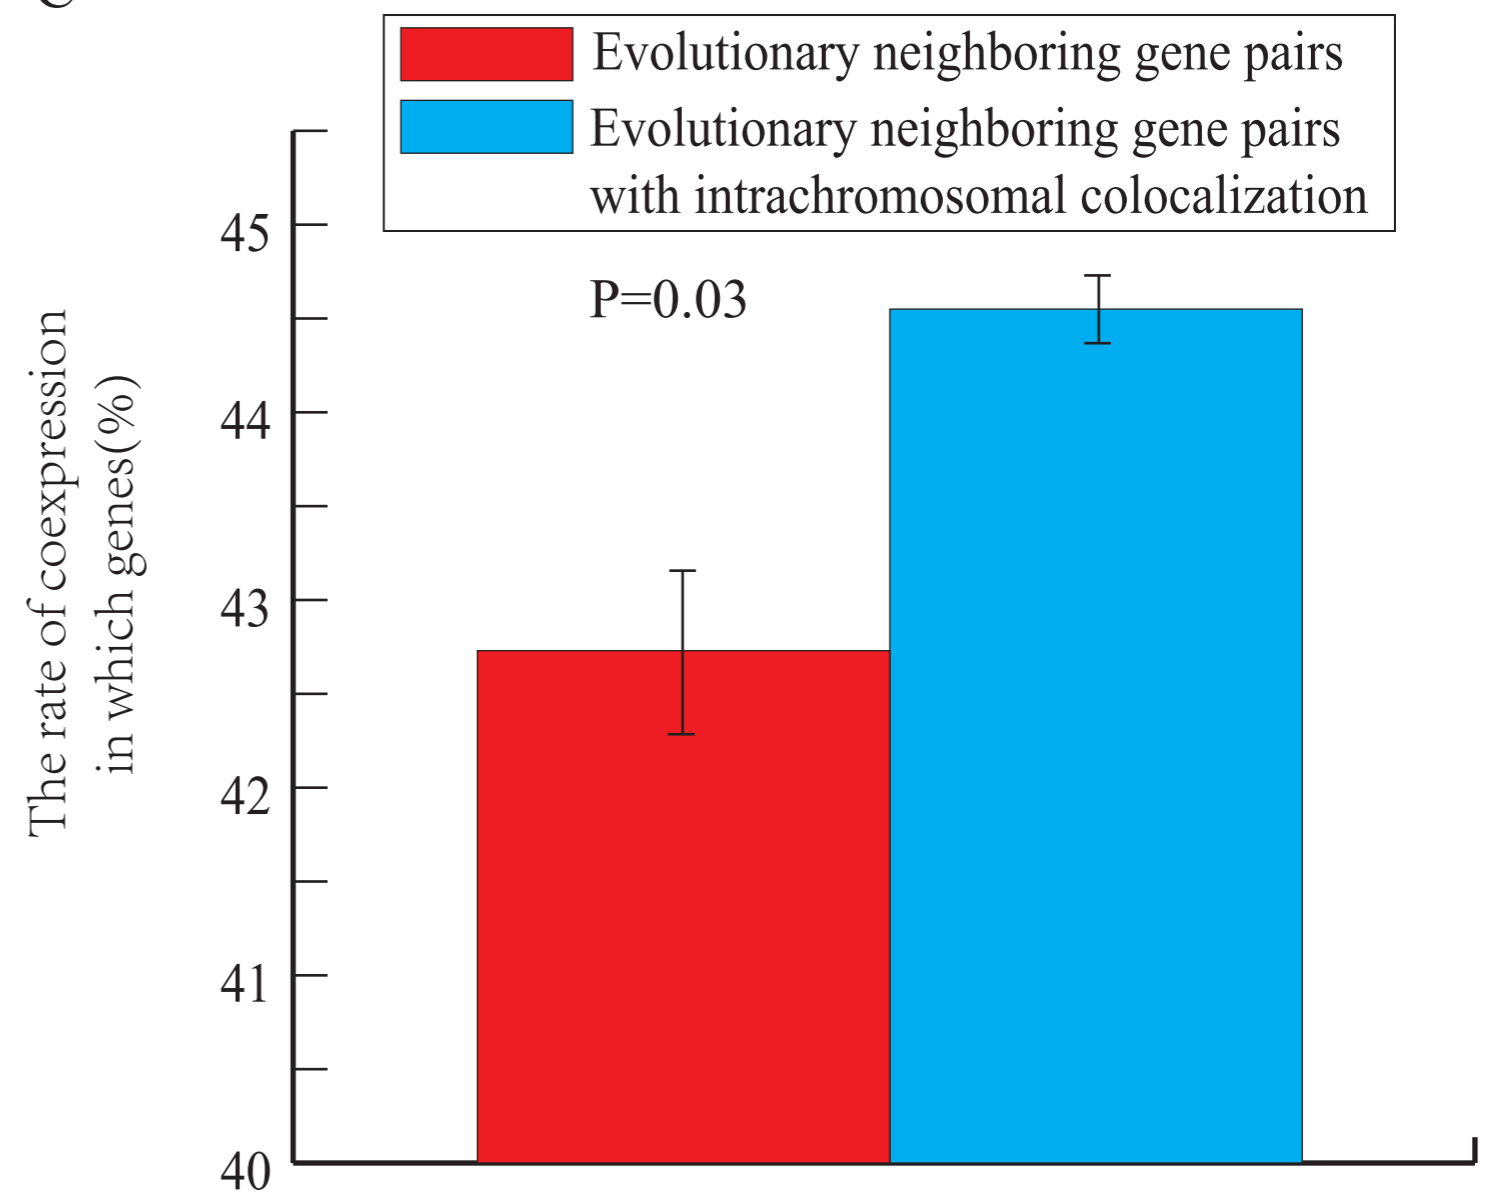

D

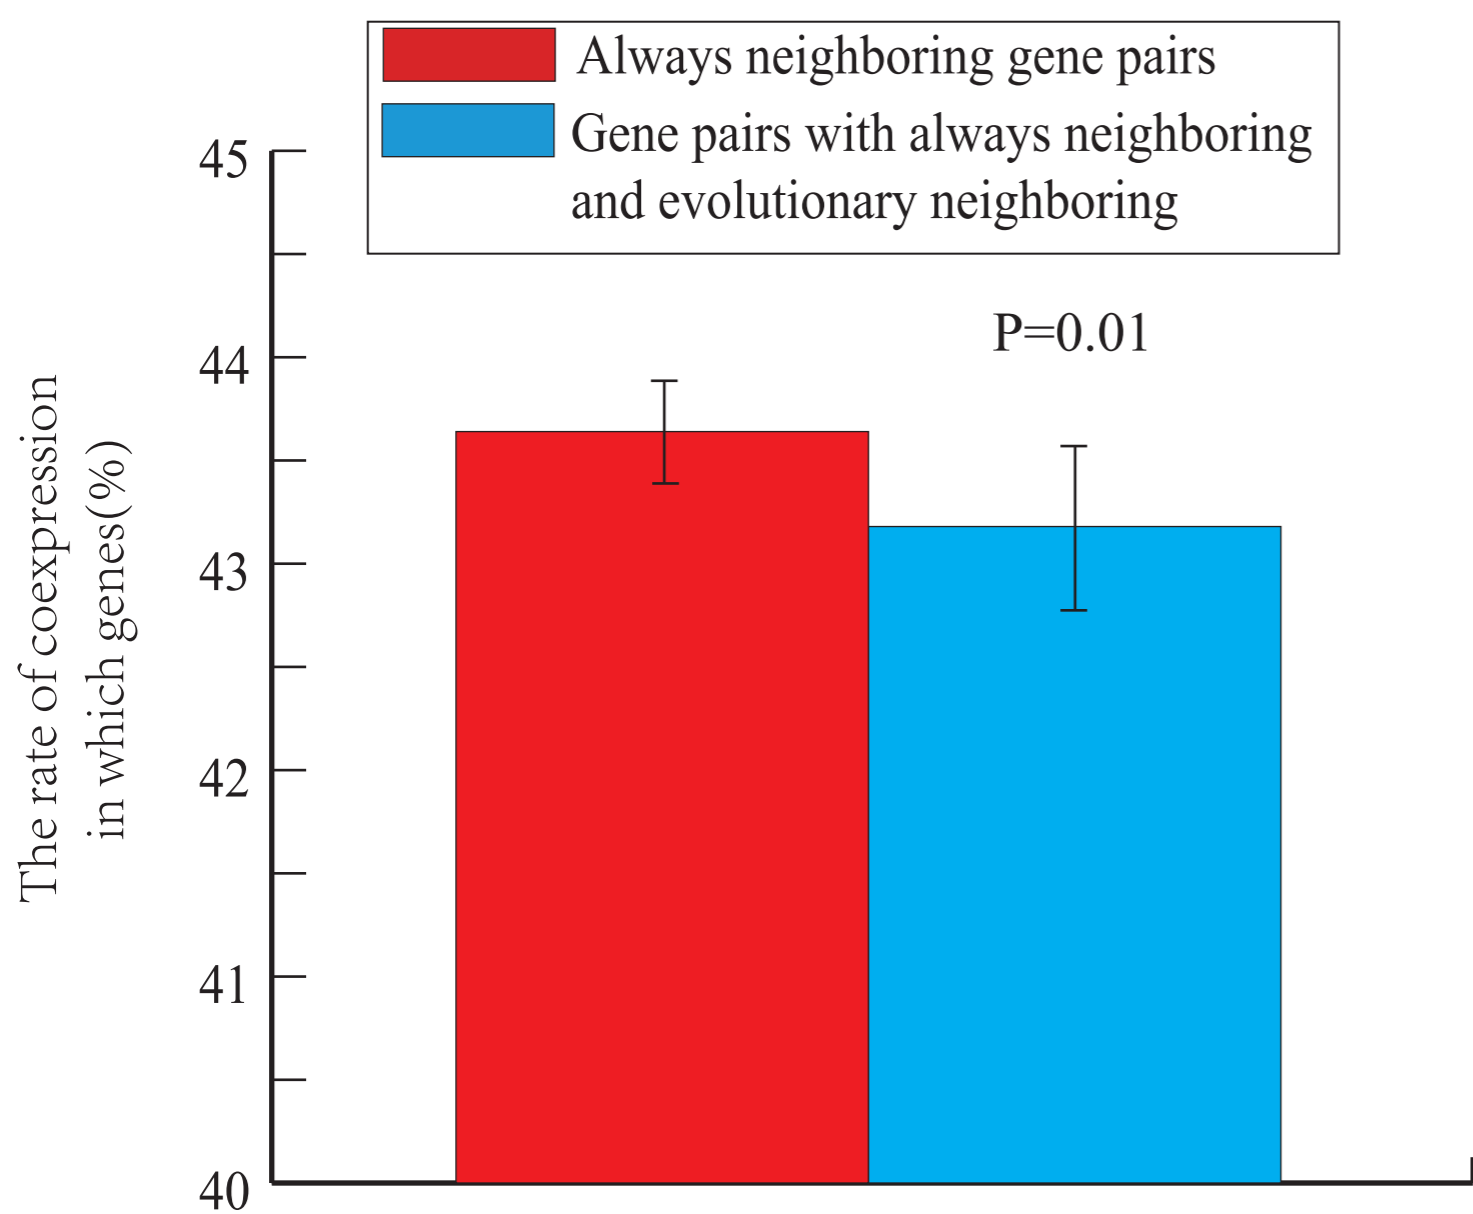

E

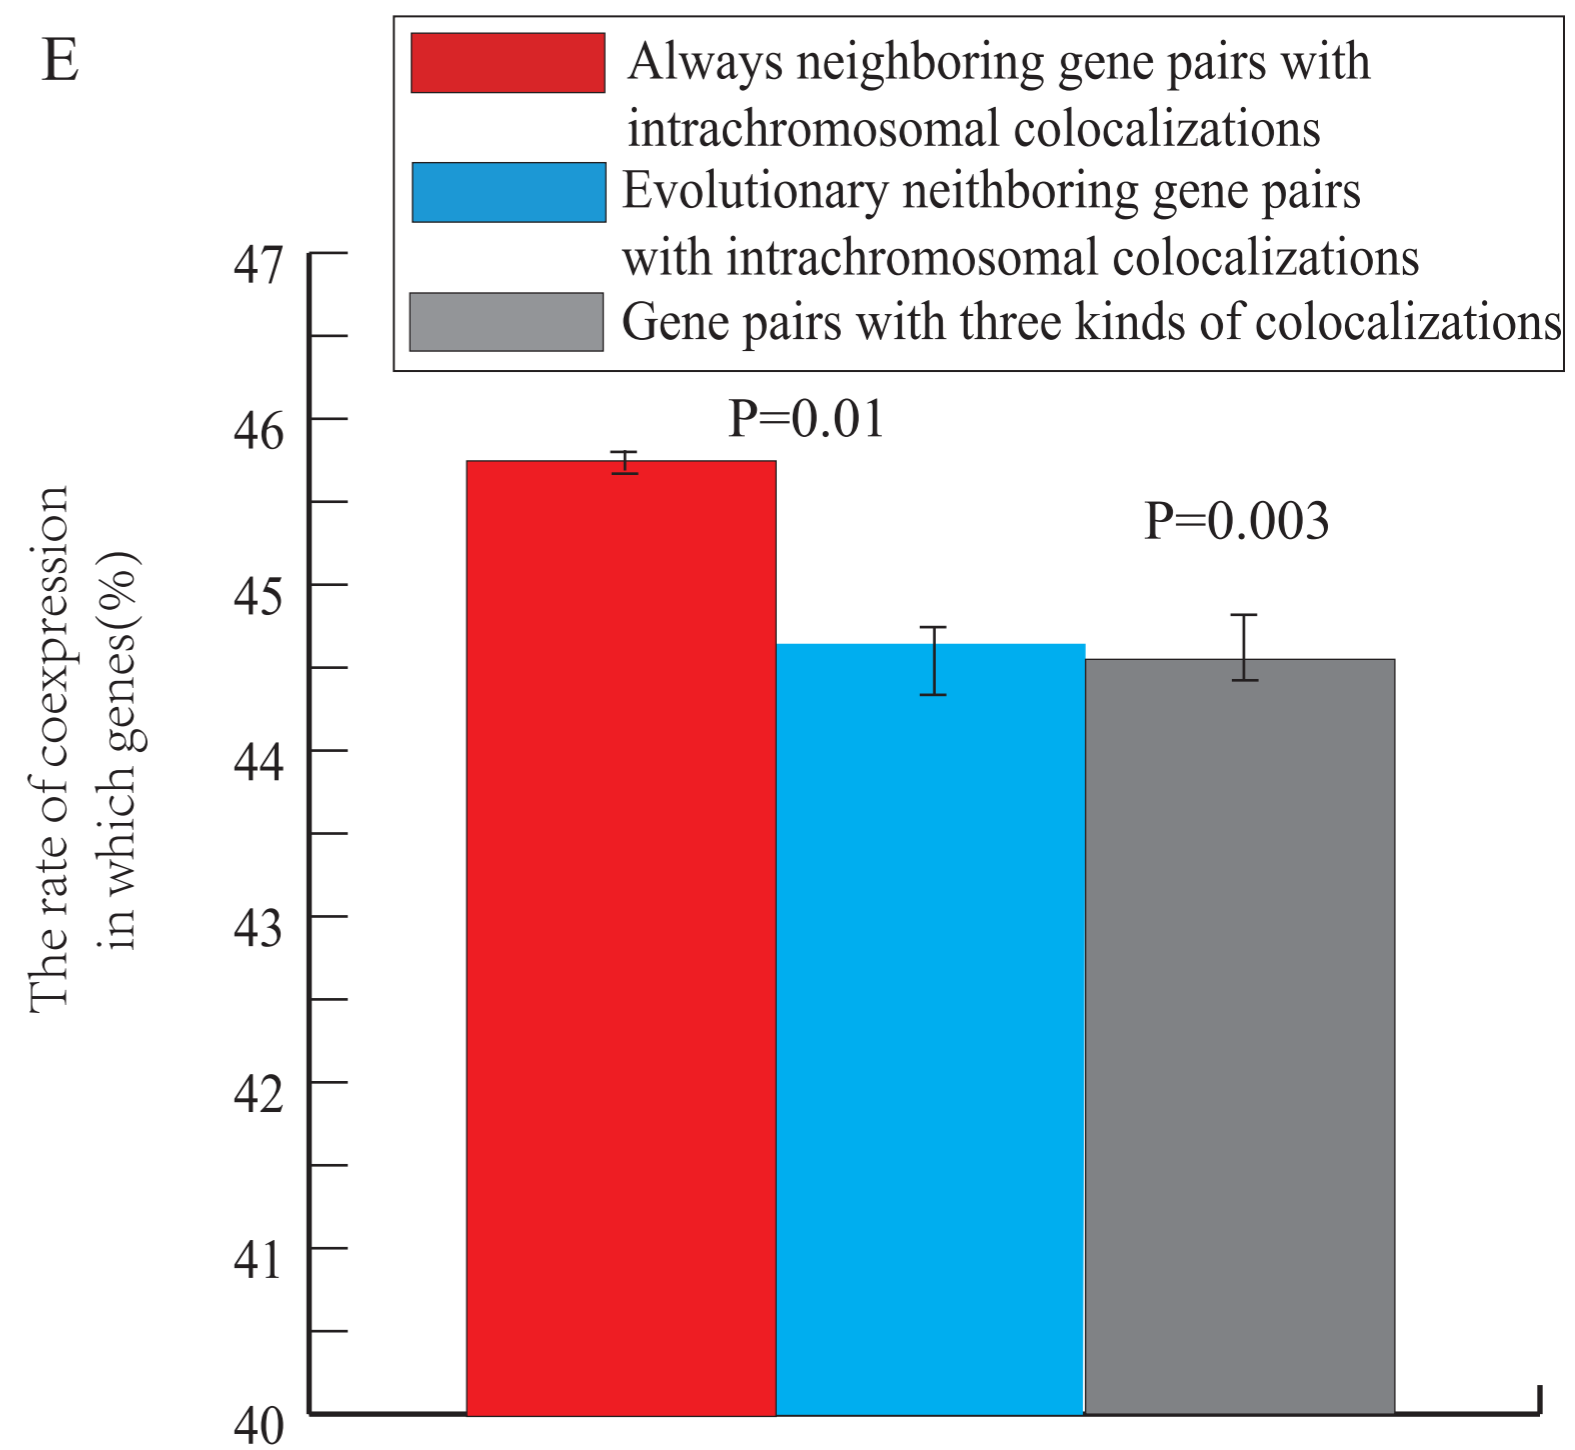

Supplement: 12864_2018_4844_MOESM4_ESM.pdf [file 12864_2018_4844_MOESM4_ESM.pdf]
